# Supplementary material for: PARP1 as a Marker of an Aggressive Clinical Phenotype in Cutaneous Melanoma—A Clinical and an In Vitro Study
Source: PubMed Central journal article supplement (PMC7911865; doi:10.3390/cells10020286), 2021-01-31
Supplement: cells-10-00286-s001.pdf [file cells-10-00286-s001.pdf]

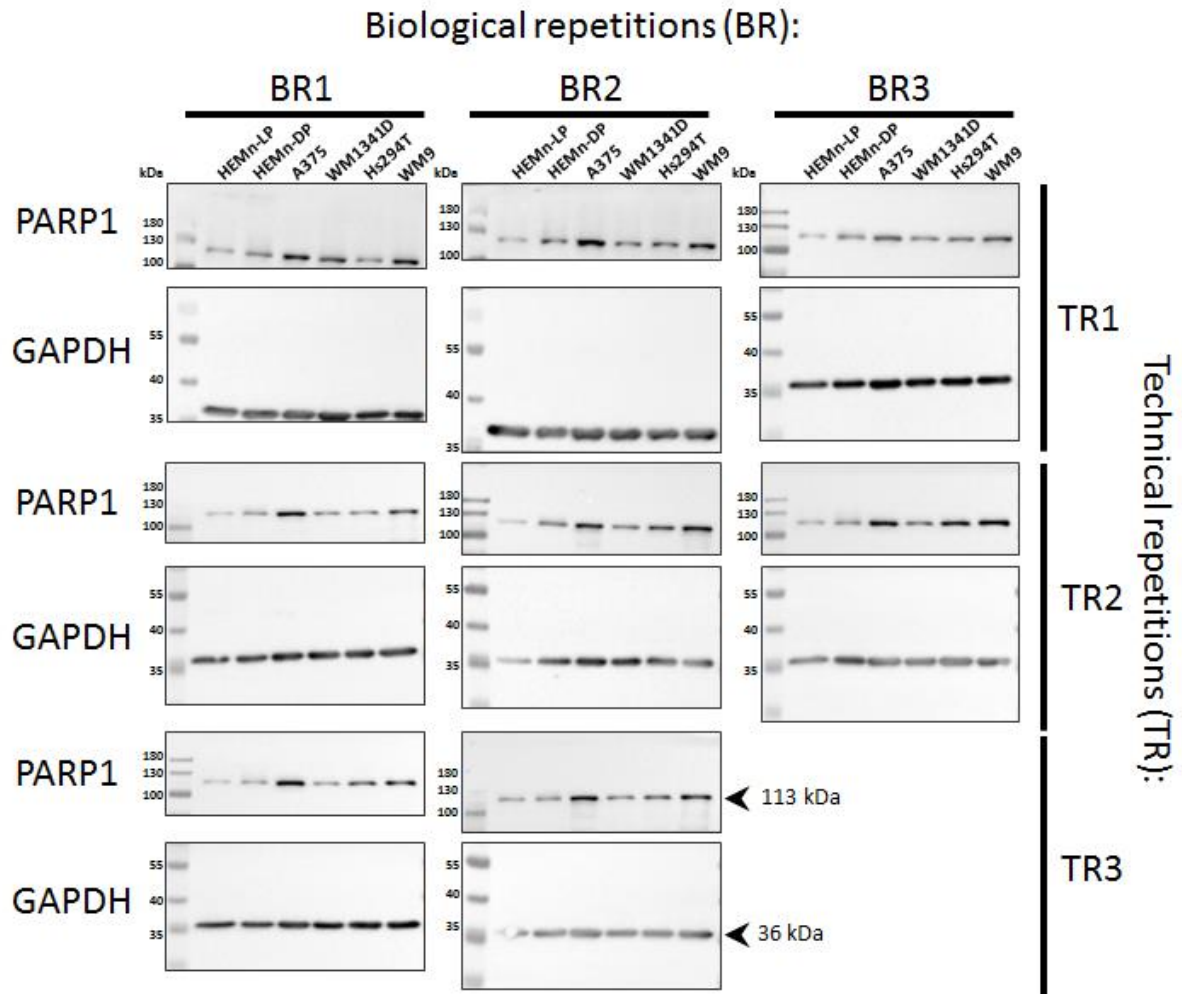

**Supplementary Figure S1.** Expression of PARP1 at protein level. Full immunoblots showing PARP1 and GAPDH level in cellular extracts of primary normal melanocytes (HEMn-LP and HEMn-DP) and melanoma cell lines derived from the primary tumor (A375 and WM1341D) and lymph node metastases (Hs294T and WM9) are presented. Three biological repetitions (BR) consisting of two-three technical replicates (TR) per BR were performed.

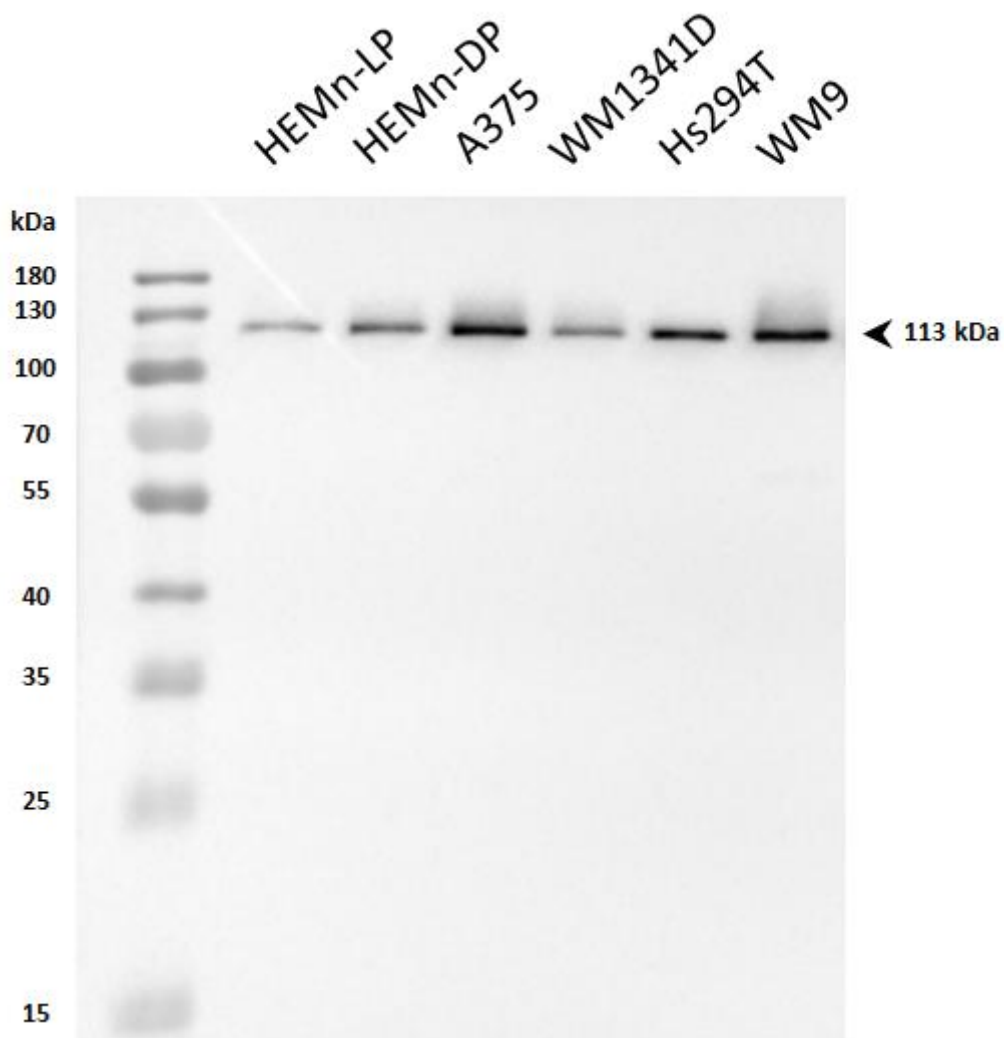

**Supplementary Figure S2.** Specificity of PARP1 antibody. Full immunoblot showing specific band of PARP1 protein (113 kDa) in cellular extracts of primary normal melanocytes (HEMn-LP and HEMn-DP) and melanoma cell lines derived from the primary tumor (A375 and WM1341D) and lymph node metastases (Hs294T and WM9) are presented.

**Supplementary Table S1.** Correlations between PARP1 expression and clinicopathologic parameters of cutaneous melanoma patients with lymph node metastases.

| CLINICOPATHOLOGICAL<br>PARAMETERS           | PARP1 expression                |                                 | <i>p</i> value |
|---------------------------------------------|---------------------------------|---------------------------------|----------------|
|                                             | Low<br>(H-score ≤280)<br>(n=26) | High<br>(H-score >280)<br>(n=6) |                |
| <b>Age (18-80) <sup>a</sup></b>             | 60 (53 - 73)                    | 66 (44 - 70)                    | 0.87           |
| <b>Gender <sup>b</sup></b>                  |                                 |                                 | 0.17           |
| Female                                      | 15 (58%)                        | 1 (17%)                         |                |
| Male                                        | 11 (42%)                        | 5 (83%)                         |                |
| <b>Primary tumor location <sup>c</sup></b>  |                                 |                                 | 0.54           |
| Head/neck                                   | 1 (4%)                          | 1 (17%)                         |                |
| Extremities                                 | 11 (42%)                        | 2 (33%)                         |                |
| Trunk                                       | 10 (38%)                        | 3 (50%)                         |                |
| Hand/foot                                   | 4 (15%)                         | 0 (0%)                          |                |
| <b>Primary tumor (pT) <sup>a</sup></b>      |                                 |                                 | 0.22           |
| pT1                                         | 1 (4%)                          | 1 (17%)                         |                |
| pT2                                         | 0 (0%)                          | 0 (0%)                          |                |
| pT3                                         | 7 (27%)                         | 3 (50%)                         |                |
| pT4                                         | 18 (69%)                        | 2 (33%)                         |                |
| <b>Distant metastases (pM) <sup>b</sup></b> |                                 |                                 | 0.62           |
| No metastases (pM-)                         | 20 (77%)                        | 4 (67%)                         |                |
| Metastases present (pM+)                    | 6 (23%)                         | 2 (33%)                         |                |
| <b>Recurrence <sup>b</sup></b>              |                                 |                                 | 1.00           |
| No                                          | 7 (27%)                         | 2 (33%)                         |                |
| Yes                                         | 19 (73%)                        | 4 (67%)                         |                |
| <b>Breslow thickness <sup>a</sup></b>       |                                 |                                 | 0.22           |
| ≤1 mm                                       | 1 (4%)                          | 1 (17%)                         |                |
| 1.01-2.00 mm                                | 0 (0%)                          | 0 (0%)                          |                |
| 2.01-4.00 mm                                | 7 (27%)                         | 3 (50%)                         |                |
| >4 mm                                       | 18 (69%)                        | 2 (33%)                         |                |
| <b>Clark level <sup>a</sup></b>             |                                 |                                 | 0.92           |
| I                                           | 0 (0%)                          | 0 (0%)                          |                |
| II                                          | 2 (8%)                          | 1 (17%)                         |                |
| III                                         | 8 (31%)                         | 2 (33%)                         |                |
| IV                                          | 10 (38%)                        | 2 (33%)                         |                |
| V                                           | 6 (23%)                         | 1 (17%)                         |                |

|                                                           |          |          |  |              |
|-----------------------------------------------------------|----------|----------|--|--------------|
| <b>Histopathological type <sup>b</sup></b>                |          |          |  | 0.80         |
| Superficial spreading melanoma                            | 4 (15%)  | 1 (17%)  |  |              |
| Nodular melanoma                                          | 18 (70%) | 5 (83%)  |  |              |
| Acral lentiginous melanoma                                | 4 (15%)  | 0 (0%)   |  |              |
| <b>Mitotic rate <sup>a</sup></b>                          |          |          |  | 1.00         |
| 0                                                         | 3 (12%)  | 0 (0%)   |  |              |
| 1-3                                                       | 2 (8%)   | 0 (0%)   |  |              |
| ≥4                                                        | 20 (80%) | 6 (100%) |  |              |
| <b>Ulceration <sup>c</sup></b>                            |          |          |  | 1.00         |
| No                                                        | 11 (42%) | 2 (33%)  |  |              |
| Yes                                                       | 15 (58%) | 4 (67%)  |  |              |
| <b>Lymphangioinvasion <sup>c</sup></b>                    |          |          |  | 1.00         |
| No                                                        | 22 (85%) | 5 (83%)  |  |              |
| Yes                                                       | 4 (15%)  | 1 (17%)  |  |              |
| <b>Tumor-infiltrating lymphocytes (TILs) <sup>c</sup></b> |          |          |  | 0.51         |
| No                                                        | 2 (8%)   | 0 (0%)   |  |              |
| Non-brisk                                                 | 21 (81%) | 4 (67%)  |  |              |
| Brisk                                                     | 3 (12%)  | 2 (33%)  |  |              |
| <b>Microsatellitosis <sup>c</sup></b>                     |          |          |  | <b>0.034</b> |
| No                                                        | 24 (92%) | 3 (50%)  |  |              |
| Yes                                                       | 2 (8%)   | 3 (50%)  |  |              |
| <b>Regression <sup>c</sup></b>                            |          |          |  | 0.48         |
| No                                                        | 24 (92%) | 5 (83%)  |  |              |
| Yes                                                       | 2 (8%)   | 1 (17%)  |  |              |

<sup>a</sup> *p* Wilcoxon two sample test

<sup>b</sup> *p* value of Fisher's exact test

<sup>c</sup> *p* value of chi<sup>2</sup> test

Statistically significant results (*p*<0.05)
